# Supplementary material
Source: PubMed Central journal article supplement (PMC4517297)
Supplement: NIHMS598523-supplement-Supplemental_Table.pdf [file NIHMS598523-supplement-Supplemental_Table.pdf]

## Supplemental S1 Characteristics of marmoset and human samples

### Healthy marmosets

| <u>Sample size</u> | <u>Sex</u> | <u>Age (y)</u> | <u>Weight (g)</u> | <u>% Body Fat</u> |
|--------------------|------------|----------------|-------------------|-------------------|
| <i>n</i> = 15      | F          | 3.35±0.22      | 392±15            | 11.7±1.2          |
| <i>n</i> = 15      | M          | 3.74±0.30      | 378±8             | 8.2±1.2           |

### Human samples

#### Random individual samples

|              | <u>Sex</u> | <u>Age (y)</u> | <u>BMI</u> | <u>Race</u>      |
|--------------|------------|----------------|------------|------------------|
| <i>n</i> = 3 | F          | 24±5           | 22.9±1.7   | 2 black, 1 white |
| <i>n</i> = 1 | M          | 36             | 20         | black            |

#### Pooled human plasma

|            | <u>Source</u>     | <u>Characteristics</u>                     |
|------------|-------------------|--------------------------------------------|
| 2 aliquots | NIST              | Equal number of males and females, 40-50 y |
| 2 aliquots | Equitech-Bio, Inc | No information                             |
